# Supplementary material
Source: Springer Nature journal article supplement (https://www.springermedizin.de/resource/supplementary/13075_2011_3599_MOESM1_ESM.pdf/9694904)

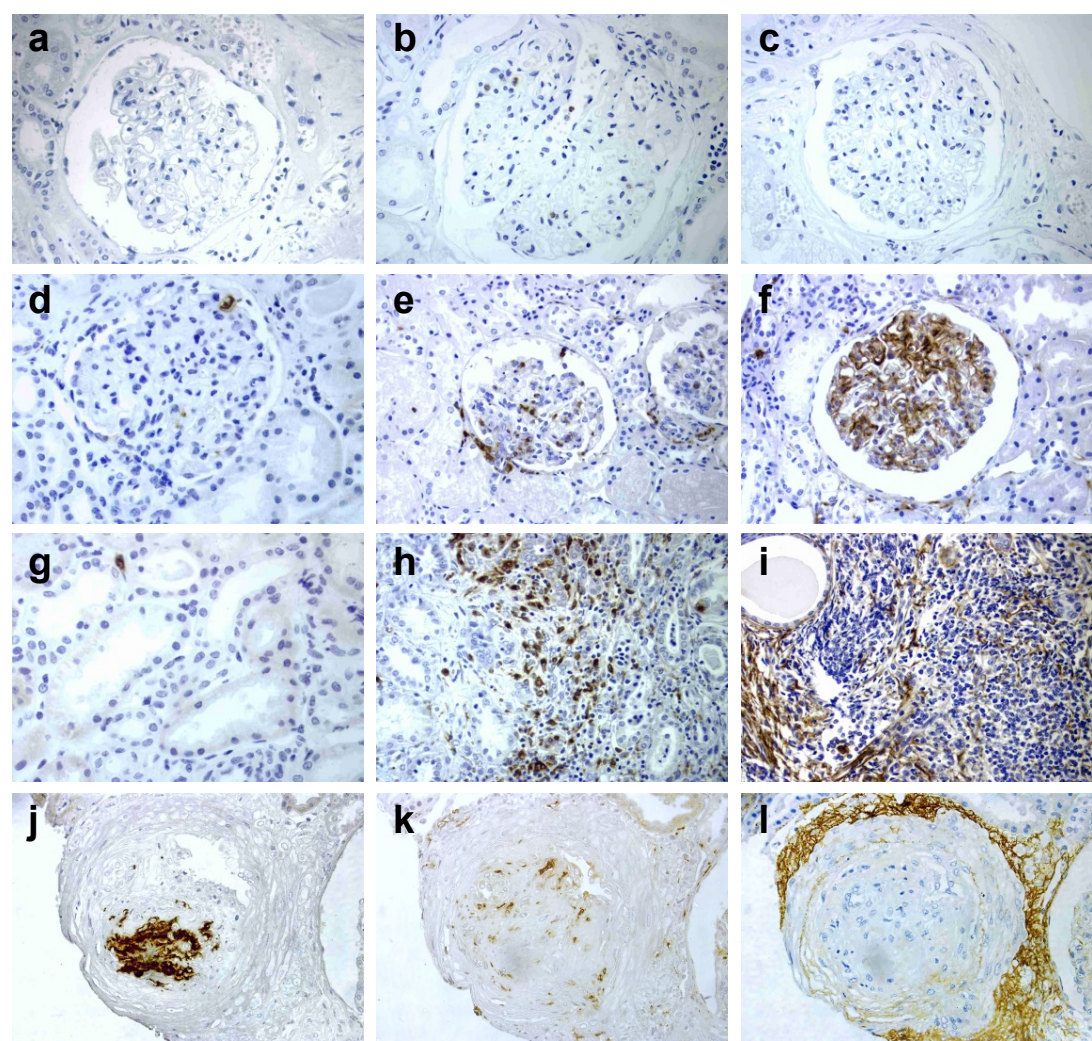

Supplement: MOESM1 [file 9694904]
